# Supplementary material for: MgO-supported bimetallic catalysts consisting of segregated, essentially molecular rhodium and osmium species
Source: Royal Society of Chemistry journal article supplement (doi:10.1039/c3dt50440a), 2013-01-01
Supplement: c3dt50440a.pdf [file c3dt50440a.pdf]

## SUPPORTING INFORMATION

# **MgO-Supported Bimetallic Catalysts Consisting of Segregated, Essentially Molecular Rhodium and Osmium Species**

**Joseph D. Kistler,<sup>a</sup> Pedro Serna<sup>a</sup> and Bruce C. Gates<sup>\*a</sup>**

Table S1. Table of Assignment of infrared bands in the  $\nu_{\text{CO}}$  region of initial samples on MgO prepared from (a)  $\text{Os}_3(\text{CO})_{12}$  (b)  $\text{Rh}(\text{C}_2\text{H}_4)_2(\text{acac})$  followed by a CO pulse and (c)  $\text{Os}_3(\text{CO})_{12}$  and  $\text{Rh}(\text{C}_2\text{H}_4)_2(\text{acac})$  adsorbed in that order

| (a) $[\text{Os}_3(\text{CO})_{11}]^{2-}$ | (b) $\text{Rh}(\text{CO})_2$ | (c) $[\text{Os}_3(\text{CO})_{11}]^{2-} + \text{Rh}(\text{C}_2\text{H}_4)_2$ | Assignment                  |
|------------------------------------------|------------------------------|------------------------------------------------------------------------------|-----------------------------|
| 2079                                     |                              | 2080                                                                         | (C≡O)terminal <sup>16</sup> |
|                                          | 2075                         |                                                                              | C≡O Stretching              |
| 2010                                     |                              | 2010                                                                         | (C≡O)terminal <sup>16</sup> |
|                                          | 1995                         |                                                                              | C≡O Stretching              |
| 1935                                     |                              | 1930                                                                         | (C≡O)terminal <sup>16</sup> |

Table S2. Table of Assignment of Infrared Bands in the  $\nu_{\text{CH}}$  region of initial samples on MgO prepared from (d)  $\text{Rh}(\text{C}_2\text{H}_4)_2(\text{acac})$  and (e)  $\text{Os}_3(\text{CO})_{12}$  and  $\text{Rh}(\text{C}_2\text{H}_4)_2(\text{acac})$  adsorbed in that order

| (d) $\text{Rh}(\text{C}_2\text{H}_4)_2$ | (e) $[\text{Os}_3(\text{CO})_{11}]^{2-} + \text{Rh}(\text{C}_2\text{H}_4)_2$ | Assignment                                |
|-----------------------------------------|------------------------------------------------------------------------------|-------------------------------------------|
| 3080                                    | 3080                                                                         | (C <sub>3</sub> -H)(acac) <sup>3</sup>    |
| 3064                                    | 3060                                                                         | (CH <sub>2</sub> )(ethylene) <sup>3</sup> |
| 2996                                    | 3001                                                                         | (CH <sub>3</sub> )(acac) <sup>3</sup>     |
| 2964                                    | 2960                                                                         | (CH <sub>3</sub> )(acac) <sup>3</sup>     |
| 2927                                    | 2931                                                                         | (CH <sub>3</sub> )(acac) <sup>3</sup>     |
| 2851                                    | 2853                                                                         | Combination band <sup>3</sup>             |

Table S3. Table of Assignment of Infrared Bands in the  $\nu_{\text{CO}}$  region of samples from Table S1 after treatment at 393 K in H<sub>2</sub> and a pulse of CO

| (a) $[\text{Os}_3(\text{CO})_{11}]^{2-}$ | (b) $\text{Rh}(\text{CO})_2$ | (c) $[\text{Os}_3(\text{CO})_{11}]^{2-} + \text{Rh}(\text{C}_2\text{H}_4)_2$ | Assignment         |
|------------------------------------------|------------------------------|------------------------------------------------------------------------------|--------------------|
| 2090                                     |                              |                                                                              | Terminal Carbonyls |
|                                          | 2072                         | 2080                                                                         | Terminal Carbonyls |
|                                          | 2047                         |                                                                              | Terminal Carbonyls |
| 2030                                     |                              |                                                                              | Terminal Carbonyls |
| 2015                                     |                              | 2010                                                                         | Terminal Carbonyls |
|                                          | 2005                         |                                                                              | Terminal Carbonyls |
| 1990                                     |                              |                                                                              |                    |
| 1935                                     |                              | 1933                                                                         | Bridging Carbonyls |
|                                          | 1890                         |                                                                              | Bridging Carbonyls |

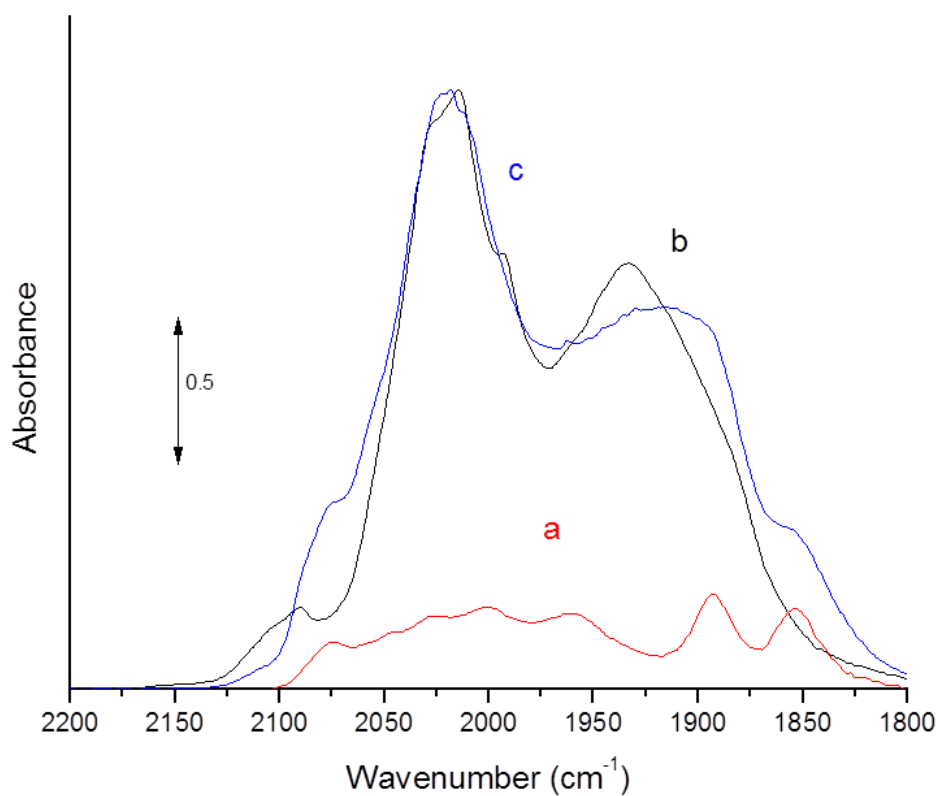

**Figure S1.** IR spectra (absorbance) in the  $\nu_{\text{CO}}$  region characterizing MgO-supported samples treated at 393 K for 1 h in flowing  $\text{H}_2$  followed by a CO pulse at 298 K: (a)  $\text{Rh}(\text{C}_2\text{H}_4)_2$ , (b)  $[\text{Os}_3(\text{CO})_{11}]^{2-}$ , (c)  $[\text{Os}_3(\text{CO})_{11}]^{2-} + \text{Rh}(\text{C}_2\text{H}_4)_2$ .

Table S4. EXAFS fit parameters characterizing supported osmium and rhodium species at the Os L3 edge and the Rh K edge: (1) Sample 1, formed from adsorption of Rh(C<sub>2</sub>H<sub>4</sub>)<sub>2</sub>(acac) on MgO ( $\Delta k = 3.8\text{--}13.3 \text{ \AA}^{-1}$ ,  $\Delta R = 0.8\text{--}4.0 \text{ \AA}$ ); (2) Sample 2, which is Sample 1 after treatment with continuously flowing H<sub>2</sub> at 353 K for 1 h ( $\Delta k = 3.1\text{--}13.9 \text{ \AA}^{-1}$ ,  $\Delta R = 0.8\text{--}4.0 \text{ \AA}$ ); (3) Sample 3, formed from adsorption of Os<sub>3</sub>(CO)<sub>12</sub> on MgO ( $\Delta k = 2.7\text{--}12.3 \text{ \AA}^{-1}$ ,  $\Delta R = 0.8\text{--}4.0 \text{ \AA}$ ); (4) Sample 4, which is Sample 3 after treatment with continuously flowing H<sub>2</sub> at 393 K for 1 h ( $\Delta k = 3.46\text{--}12.53 \text{ \AA}^{-1}$ ,  $\Delta R = 0.8\text{--}4.0 \text{ \AA}$ ); (5) Sample 5, formed from adsorption of Os<sub>3</sub>(CO)<sub>12</sub> followed by Rh(C<sub>2</sub>H<sub>4</sub>)<sub>2</sub>(acac) on MgO taken at the Os L3 edge ( $\Delta k = 3.1\text{--}12.9 \text{ \AA}^{-1}$ ,  $\Delta r = 0.8\text{--}4.0 \text{ \AA}$ ); (6) Sample 6, which is the same as sample 5 but with data taken at the Rh K edge ( $\Delta k = 2.8\text{--}13.0 \text{ \AA}^{-1}$ ,  $\Delta R = 0.8\text{--}4.0 \text{ \AA}$ ); (7) Sample 7, which is Sample 5 after treatment with continuously flowing H<sub>2</sub> at 393 K for 1 h taken at the Os L3 edge ( $\Delta k = 2.7\text{--}11.6 \text{ \AA}^{-1}$ ,  $\Delta r = 0.8\text{--}4.0 \text{ \AA}$ ); (8) Sample 8, which is the same as sample 5 but with data taken at the Rh K edge ( $\Delta k = 3.3\text{--}11.7 \text{ \AA}^{-1}$ ,  $\Delta r = 0.8\text{--}4.0 \text{ \AA}$ );

| Sample                                                   | Shell                    | <i>N</i> | <i>R</i> (Å) | 10 <sup>3</sup> x $\Delta\sigma^2$ (Å <sup>2</sup> ) | $\Delta E_0$ (eV) | ref       |
|----------------------------------------------------------|--------------------------|----------|--------------|------------------------------------------------------|-------------------|-----------|
| 1                                                        | Rh-Rh                    | -        | -            | -                                                    | -                 | 3         |
| Rh(C <sub>2</sub> H <sub>4</sub> ) <sub>2</sub> /MgO     | Rh-C <sub>ethylene</sub> | 4.0      | 2.04         | 0.68                                                 | 6.20              |           |
|                                                          | Rh-O <sub>support</sub>  | 1.8      | 2.18         | 0.86                                                 | -6.13             |           |
|                                                          | Rh-Mg                    | 1.83     | 3.09         | 8.80                                                 | -2.45             |           |
| 2                                                        | Rh-Rh                    | 1.0      | 2.71         | 5.8                                                  | -2.9              | 4         |
| Rh(C <sub>2</sub> H <sub>4</sub> ) <sub>2</sub> /MgO     | Rh-C <sub>ethyl</sub>    | 1.2      | 2.09         | 0.01                                                 | 6.9               |           |
|                                                          | Rh-O <sub>support</sub>  | 1.0      | 2.21         | 2.7                                                  | 7.2               |           |
|                                                          | Rh-Mg                    | 0.7      | 2.86         | 0.07                                                 | 0.6               |           |
| 3                                                        | Os-Os                    | 2.2      | 2.89         | 3.30                                                 | 2.31              | 5         |
| [Os <sub>3</sub> (CO) <sub>11</sub> ] <sup>2-</sup> /MgO | Os-C <sub>CO</sub>       | 3.2      | 1.89         | 3.45                                                 | 6.61              |           |
|                                                          | Os-O <sub>CO</sub>       | 3.2      | 3.03         | 3.92                                                 | 4.68              |           |
|                                                          | Os-O <sub>support</sub>  | 0.9      | 2.12         | -1.54                                                | -4.59             |           |
| 4                                                        | Os-Os                    | 2.1      | 2.84         | 1.44                                                 | 5.50              | This work |
| [Os <sub>3</sub> (CO) <sub>11</sub> ] <sup>2-</sup> /MgO | Os-C <sub>CO</sub>       | 1.86     | 1.87         | 2.22                                                 | 3.24              |           |
|                                                          | Os-O <sub>CO</sub>       | 1.86     | 2.95         | 2.86                                                 | 7.54              |           |
|                                                          | Os-O <sub>support</sub>  | 0.9      | 2.08         | 0.05                                                 | -6.22             |           |
| 5                                                        | Os-Os                    | 1.96     | 2.78         | 10.75                                                | -5.55             | This work |

|                                                                                          |                          |      |       |      |       |           |
|------------------------------------------------------------------------------------------|--------------------------|------|-------|------|-------|-----------|
| $[\text{Os}_3(\text{CO})_{11}]^{2-} + \text{Rh}(\text{C}_2\text{H}_4)_2/\text{MgO}$      | Os–Rh                    | -    | -     | -    | -     |           |
|                                                                                          | Os–C <sub>CO</sub>       | 1.76 | 1.96  | 4.88 | 1.83  |           |
|                                                                                          | Os–O <sub>CO</sub>       | 1.76 | 3.04  | 5.36 | -5.76 |           |
|                                                                                          | Os–O <sub>Support</sub>  | 0.9  | 2.08  | -0.1 | -1.62 |           |
| 6<br>$[\text{Os}_3(\text{CO})_{11}]^{2-} + \text{Rh}(\text{C}_2\text{H}_4)_2/\text{MgO}$ | Rh–Rh                    | --   | --    | --   | --    | This work |
|                                                                                          | Rh–Os                    | --   | --    | --   | --    |           |
|                                                                                          | Rh–C <sub>ethylene</sub> | 4.02 | 2.07  | 0.87 | -1.00 |           |
|                                                                                          | Rh–O <sub>support</sub>  | 2.16 | 2.14  | 1.42 | 1.15  |           |
|                                                                                          | Rh–Mg                    | 0.99 | 2.946 | 0.50 | -3.77 |           |
| 7<br>$[\text{Os}_3(\text{CO})_{11}]^{2-} + \text{Rh}(\text{C}_2\text{H}_4)_2/\text{MgO}$ | Os–Os                    | 1.9  | 2.65  | 1.8  | 6.31  | This work |
|                                                                                          | Os–Rh                    | -    | -     | -    | -     |           |
|                                                                                          | Os–C <sub>CO</sub>       | 1.5  | 1.97  | 0.88 | 1.21  |           |
|                                                                                          | Os–O <sub>CO</sub>       | 1.5  | 3.13  | 2.99 | 3.68  |           |
|                                                                                          | Os–O <sub>Support</sub>  | 0.9  | 0.55  | 2.01 | -7.04 |           |

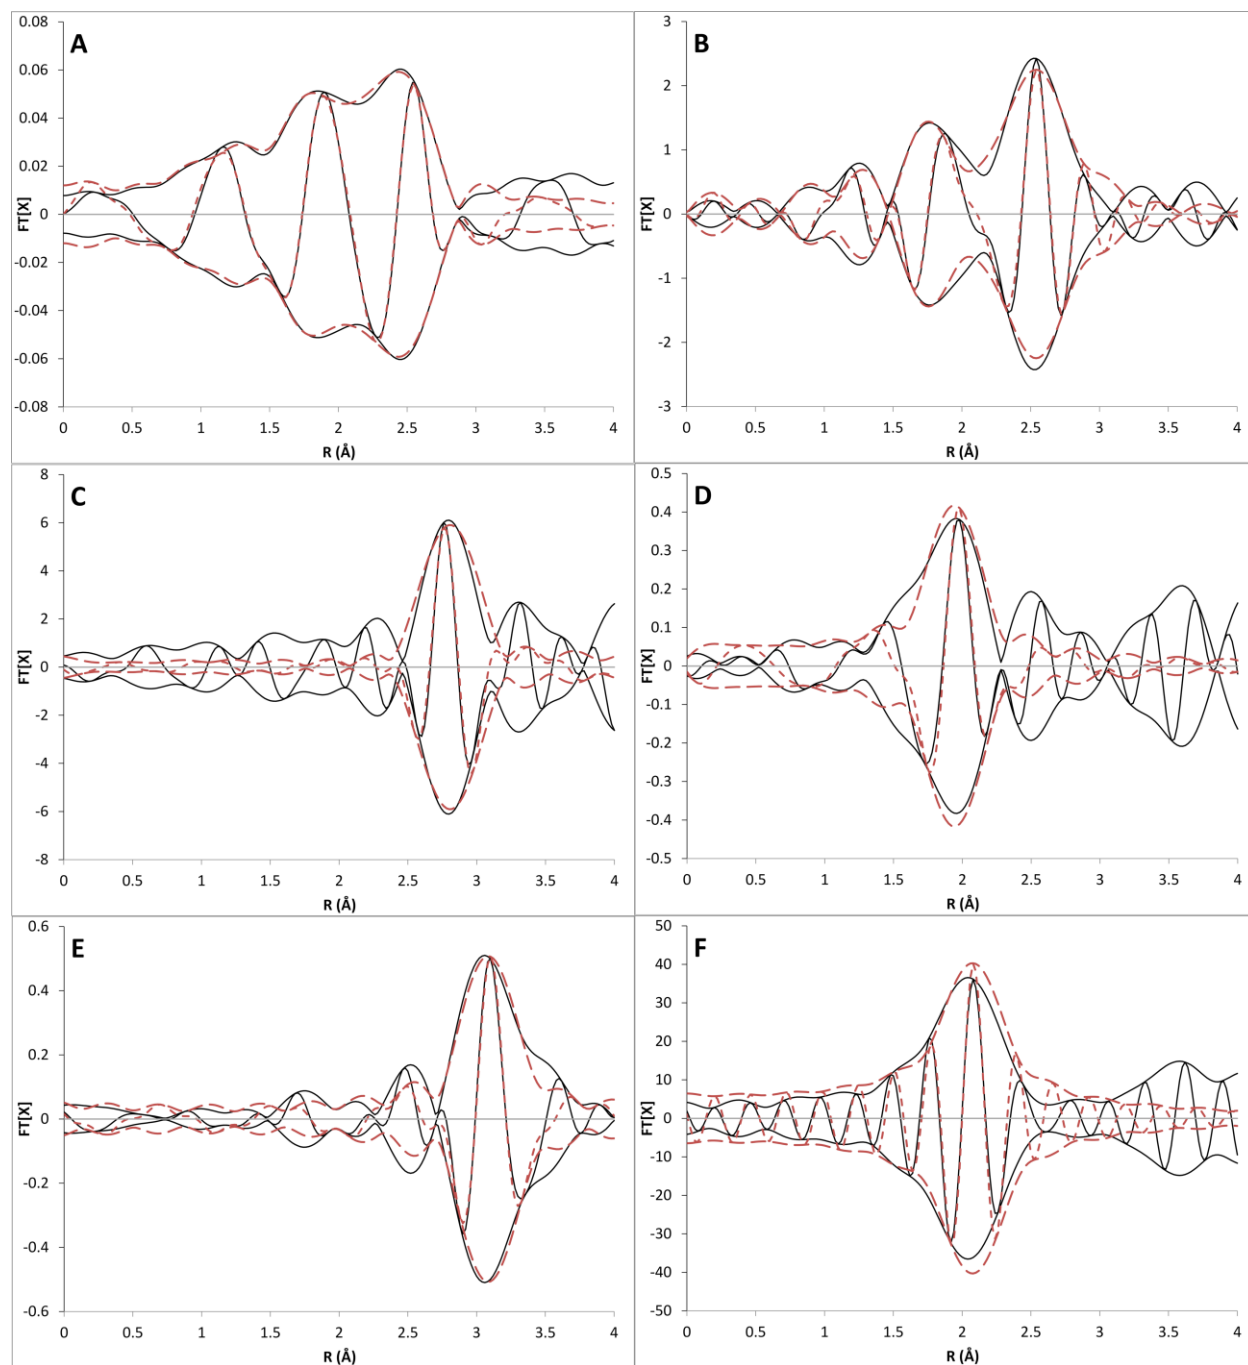

**Figure S2.** EXAFS data characterizing initially prepared MgO-supported  $[\text{Os}_3(\text{CO})_{11}]^{2-}$  and  $\text{Rh}(\text{C}_2\text{H}_4)_2$ ; the spectra were recorded as the sample was in helium flowing at 298K: (A)  $k^1$ -weighted EXAFS data (solid line) and the best fit (dashed line). (B) Magnitude and imaginary part of Fourier transform of  $k^3$ -weighted EXAFS data (solid line) and the best fit (dashed line) (C)  $k^3$ -weighted, phase-corrected, imaginary part and magnitude of the Fourier transform of the data (solid line) and calculate contributions (dashed line) of Os-Os shell; EXAFS data (solid line)

and the best fit (dashed line); (D)  $k^1$ -weighted, phase-corrected, imaginary part and magnitude of the Fourier transform of the data (solid line) and calculate contributions (dashed line) of Os-C<sub>carbonyl</sub> shell; EXAFS data (solid line) and the best fit (dashed line); (E)  $k^1$ -weighted, phase-corrected, imaginary part and magnitude of the Fourier transform of the data (solid line) and calculate contributions (dashed line) of Os-O<sub>carbonyl</sub> shell; EXAFS data (solid line) and the best fit (dashed line); (F)  $k^3$ -weighted, phase-corrected, imaginary part and magnitude of the Fourier transform of the data (solid line) and calculate contributions (dashed line) of Os-O<sub>support</sub> shell; EXAFS data (solid line) and the best fit (dashed line);

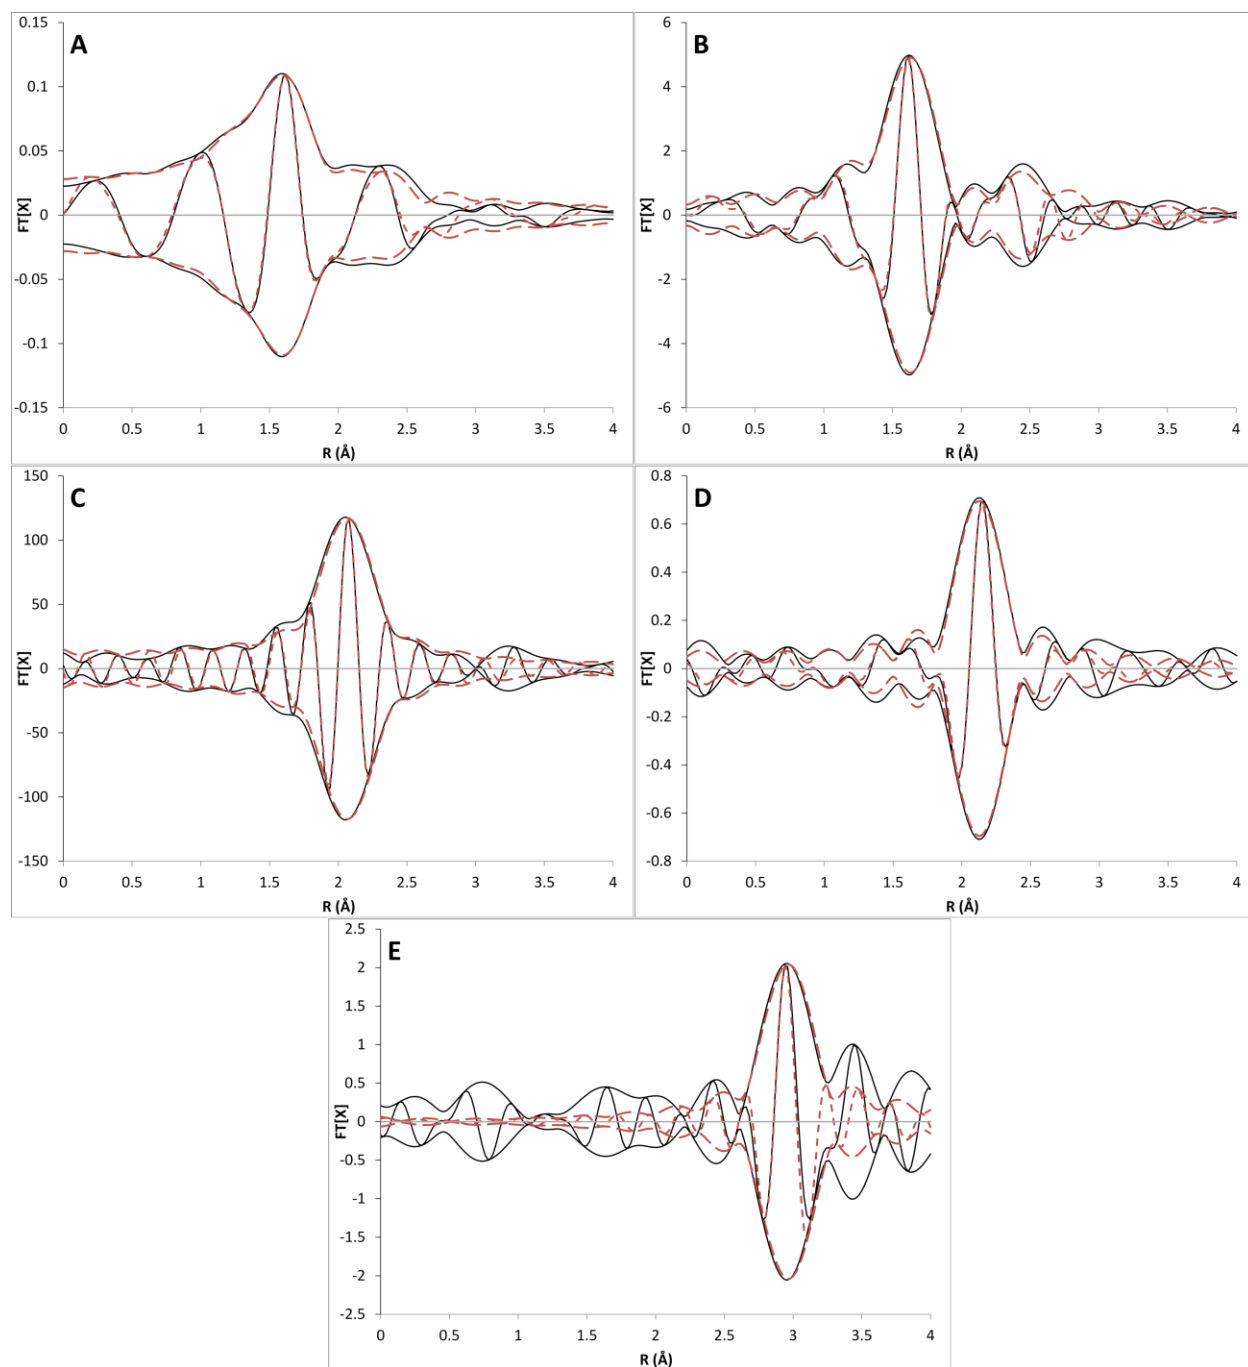

**Figure S3.** EXAFS data characterizing initially prepared MgO-supported  $[\text{Os}_3(\text{CO})_{11}]^{2-}$  and  $\text{Rh}(\text{C}_2\text{H}_4)_2$ ; the spectra were recorded as the sample was in helium flowing at 298 K: (A) Magnitude and imaginary part of Fourier transform of  $k^1$ -weighted EXAFS data (solid line) and best fit of the data (dashed line); (B)  $k^3$ -weighted, phase-corrected, imaginary part and magnitude of the Fourier transform of the data (solid line) and calculated contributions (dashed line) of Rh–C<sub>ethylene</sub> shell; EXAFS data (solid line) and best fit of the data (dashed line); (C)  $k^1$ -weighted,

phase-corrected, imaginary part and magnitude of the Fourier transform of the data (solid line) and calculated contributions (dashed line) of Rh–C<sub>ethylene</sub> shell; EXAFS data (solid line) and best fit of the data (dashed line); (D)  $k^1$ -weighted, phase-corrected, imaginary part and magnitude of the Fourier transform of the data (solid line) and calculated contributions (dashed line) of Rh–O<sub>support</sub> shell; EXAFS data (solid line) and best fit of the data (dashed line); (E)  $k^3$ -weighted, phase-corrected, imaginary part and magnitude of the Fourier transform of the data (solid line) and calculated contributions (dashed line) of Rh–Mg shell; EXAFS data (solid line) and best fit of the data (dashed line).
